# Supplementary material for: Optimal first-line chemotherapeutic treatment in patients with locally advanced or metastatic esophagogastric carcinoma: triplet versus doublet chemotherapy: a systematic literature review and meta-analysis
Source: Springer Nature journal article supplement (doi:10.1007/s10555-015-9576-y), 2015-08-12
Supplement: MOESM2 [file 8858002]

|                     | Random sequence generation (selection bias) | Allocation concealment (selection bias) | Blinding of outcome assessment (detection bias) | Incomplete outcome data (attrition bias) | Selective reporting (reporting bias) | Other bias |
|---------------------|---------------------------------------------|-----------------------------------------|-------------------------------------------------|------------------------------------------|--------------------------------------|------------|
| Ajani 2005          | +                                           | ?                                       | +                                               | +                                        | +                                    | +          |
| Al-Batran 2013      | +                                           | ?                                       | +                                               | +                                        | +                                    | +          |
| Cullinan 1985       | ?                                           | ?                                       | ?                                               | ?                                        | +                                    | ?          |
| Douglass 1984       | +                                           | +                                       | ?                                               | +                                        | +                                    | ?          |
| Guimbaud 2014       | +                                           | +                                       | +                                               | +                                        | +                                    | ?          |
| Kim 1993            | ?                                           | ?                                       | ?                                               | ?                                        | ?                                    | ?          |
| Kim 2001            | ?                                           | ?                                       | ?                                               | ?                                        | ?                                    | ?          |
| Koizumi 2004        | ?                                           | ?                                       | +                                               | +                                        | +                                    | +          |
| KRGCGC 1992         | +                                           | +                                       | ?                                               | ?                                        | +                                    | +          |
| Li 2011             | ?                                           | ?                                       | +                                               | ?                                        | +                                    | ?          |
| Lin 2009            | ?                                           | ?                                       | ?                                               | ?                                        | ?                                    | ?          |
| Maiello 2011        | ?                                           | ?                                       | ?                                               | ?                                        | ?                                    | ?          |
| Park 2008           | ?                                           | ?                                       | ?                                               | +                                        | +                                    | ?          |
| Roth 1999           | ?                                           | ?                                       | ?                                               | +                                        | +                                    | +          |
| Roth 2007           | +                                           | +                                       | +                                               | +                                        | +                                    | +          |
| Thuss-Patience 2005 | ?                                           | ?                                       | +                                               | +                                        | +                                    | ?          |
| Van Cutsem 2006     | +                                           | +                                       | +                                               | +                                        | +                                    | +          |
| Van Cutsem 2015     | +                                           | +                                       | ?                                               | +                                        | +                                    | +          |
| Van Hoefer 2000     | +                                           | +                                       | ?                                               | ?                                        | ?                                    | ?          |
| Wang 2015           | +                                           | +                                       | ?                                               | +                                        | +                                    | +          |
| Yun 2010            | ?                                           | ?                                       | ?                                               | +                                        | +                                    | ?          |
